# Supplementary material for: Isolation of MERS-related coronavirus from lesser bamboo bats that uses DPP4 and infects human-DPP4-transgenic mice
Source: PubMed Central journal article supplement (PMC7801609; doi:10.1038/s41467-020-20458-9), 2021-01-11
Supplement: 41467_2020_20458_MOESM1_ESM.pdf [file 41467_2020_20458_MOESM1_ESM.pdf]

## Supplementary Information

### Isolation of MERS-related coronavirus from lesser bamboo bats that uses DPP4 and infects human-DPP4-transgenic mice

Susanna K. P. Lau\*†, Rachel Y. Y. Fan\*, Longchao Zhu\*, Kenneth S. M. Li\*, Antonio C. P. Wong,  
Hayes K. H. Luk, Emily Y. M. Wong, Carol S. F. Lam, George C. S. Lo, Joshua Fung, Zirong He,  
Felix C. H. Fok, Rex K. H. Au-Yeung, Libiao Zhang, Kin-Hang Kok, Kwok-Yung Yuen\* and  
Patrick C. Y. Woo†

\*These authors contributed equally to this work.

†Corresponding authors. Email: [pcywoo@hku.hk](mailto:pcywoo@hku.hk) (P.C.Y.W.); [skplau@hku.hk](mailto:skplau@hku.hk) (S.K.P.L.)

Supplementary Tables 1 -9

Supplementary Figures 1 -5

**Supplementary Table 1** RT-PCR detection of *Ty-BatCoV HKU4* from bat samples

| Scientific name                  | No. of bats tested | No. of bats positive for <i>Ty-BatCoV HKU4</i> | Sampling location of bats                      |
|----------------------------------|--------------------|------------------------------------------------|------------------------------------------------|
| <i>Aselliscus stoliczkanus</i>   | 55                 | 0                                              | Yunnan                                         |
| <i>Chaerephon plicata</i>        | 31                 | 0                                              | Hainan, Yunnan                                 |
| <i>Cynopterus sphinx</i>         | 86                 | 0                                              | Guangdong, Guangxi, Yunnan, Hainan, Hong Kong  |
| <i>Eonycteris spelaea</i>        | 53                 | 0                                              | Yunnan                                         |
| <i>Hipposideros armiger</i>      | 219                | 0                                              | Guangdong, Guangxi, Guizhou, Yunnan, Hong Kong |
| <i>Hipposideros larvatus</i>     | 48                 | 0                                              | Guangdong, Guangxi, Hainan, Guizhou            |
| <i>Hipposideros pomona</i>       | 774                | 0                                              | Guangdong, Hainan, Guizhou, Hong Kong          |
| <i>Hipposideros pratti</i>       | 19                 | 0                                              | Guangdong                                      |
| <i>Hypsugo pulveratus</i>        | 6                  | 0                                              | Guangdong, Hong Kong                           |
| <i>la io</i>                     | 26                 | 0                                              | Guangdong, Yunnan                              |
| <i>Kervoula picta</i>            | 1                  | 0                                              |                                                |
| <i>Megaderma lyra</i>            | 1                  | 0                                              | Guangdong                                      |
| <i>Megaerops ecaudatus</i>       | 1                  | 0                                              | Yunnan                                         |
| <i>Miniopterus fuliginosus</i>   | 30                 | 0                                              | Guangdong, Hainan, Yunnan                      |
| <i>Miniopterus magnater</i>      | 17                 | 0                                              | Hong Kong                                      |
| <i>Miniopterus pusillus</i>      | 273                | 0                                              | Guangdong, Hainan, Hong Kong                   |
| <i>Miniopterus schreibersii</i>  | 492                | 0                                              | Hong Kong, Yunnan                              |
| <i>Molossus sp.</i>              | 25                 | 0                                              | Yunnan                                         |
| <i>Myotis altarium</i>           | 14                 | 0                                              | Guangdong                                      |
| <i>Myotis chinensis</i>          | 123                | 0                                              | Guangdong, Hainan, Hong Kong                   |
| <i>Myotis davidii</i>            | 2                  | 0                                              | Shanxi                                         |
| <i>Myotis fimbriatus</i>         | 6                  | 0                                              | Shanxi                                         |
| <i>Myotis formosus</i>           | 1                  | 0                                              | Guangxi                                        |
| <i>Myotis horsfieldii</i>        | 19                 | 0                                              | Hong Kong                                      |
| <i>Myotis longjipes</i>          | 4                  | 0                                              | Guangdong                                      |
| <i>Myotis pequinius</i>          | 29                 | 0                                              | Shanxi                                         |
| <i>Myotis ricketti</i>           | 483                | 0                                              | Guangdong, Hainan, Hong Kong                   |
| <i>Myotis siligorensis</i>       | 3                  | 0                                              |                                                |
| <i>Myotis daubentonii</i>        | 5                  | 0                                              | Guangdong                                      |
| <i>Nyctalus plancyi</i>          | 2                  | 0                                              | Guangdong                                      |
| <i>Nyctalus noctula</i>          | 14                 | 0                                              | Hong Kong                                      |
| <i>Pipistrellus abramus</i>      | 102                | 0                                              | Guangdong, Hainan, Yunnan, Hong Kong           |
| <i>Pipistrellus .</i>            | 7                  | 0                                              | Guangdong, Hong Kong                           |
| <i>Pipistrellus ceylonicus</i>   | 1                  | 0                                              | Guangdong                                      |
| <i>Pipistrellus tenuis</i>       | 4                  | 0                                              | Hong Kong                                      |
| <i>Rhinolophus affinis</i>       | 263                | 0                                              | Guangdong, Hainan, Zhejiang, Hong Kong         |
| <i>Rhinolophus ferrumequinum</i> | 86                 | 0                                              | Shanxi                                         |
| <i>Rhinolophus luctus</i>        | 4                  | 0                                              | Guangdong, Zhejiang                            |
| <i>Rhinolophus macrotis</i>      | 24                 | 0                                              | Guangdong, Guangxi                             |
| <i>Rhinolophus pearsoni</i>      | 29                 | 0                                              | Guangdong, Guizhou                             |
| <i>Rhinolophus pusillus</i>      | 206                | 0                                              | Guangdong, Guangxi, Hainan, Yunnan, Hong Kong  |
| <i>Rhinolophus rex</i>           | 4                  | 0                                              | Guangdong                                      |
| <i>Rhinolophus siamensis</i>     | 1                  | 0                                              | Guangdong, Yunnan                              |
| <i>Rhinolophus sinicus</i>       | 1004               | 0                                              | Guangdong, Hainan, Hong Kong                   |
| <i>Rhinolophus thomasi</i>       | 1                  | 0                                              | Yunnan                                         |
| <i>Rhinolophus sp.</i>           | 20                 | 0                                              | Yunnan                                         |
| <i>Rousettus leschenaulti</i>    | 70                 | 0                                              | Guangdong, Yunnan, Hong Kong                   |
| <i>Scotophilus kuhlii</i>        | 37                 | 0                                              | Guangdong, Hainan, Hong Kong                   |
| <i>Taphozous melanopogon</i>     | 119                | 0                                              | Yunnan, Guangxi                                |
| <i>Tylonycteris pachypus</i>     | 101                | 13                                             | Hong Kong                                      |
|                                  | 17                 | 0                                              | Guangzhou, Guangdong                           |
|                                  | 203                | 0                                              | Maoming, Guangdong                             |
|                                  | 193                | 0                                              | Longzhou, Guangxi                              |
|                                  | 244                | 1                                              | Ningming, Guangxi                              |
|                                  | 271                | 18                                             | Luodian, Guizhou,                              |
|                                  | 1                  | 0                                              | Baoting, Hainan                                |
|                                  | 14                 | 0                                              | Mengla, Yunnan                                 |
|                                  | 1044               | 32                                             |                                                |
| <i>Tylonycteris robustula</i>    | 196                | 0                                              | Guizhou, Yunnan, Guangxi                       |
| Unknown                          | 2                  | 0                                              |                                                |
| <b>Total</b>                     | <b>6086</b>        | <b>32</b>                                      |                                                |

**Supplementary Table 2** Cell lines used in this study

| Animal species of origin | Site of origin                                          | Abbreviation                               | Source  |                      |               |
|--------------------------|---------------------------------------------------------|--------------------------------------------|---------|----------------------|---------------|
| Bat                      | <i>Hipposideros pomona</i> (Pomona roundleaf bat)       | Kidney                                     | HPK     | In-house development |               |
|                          | <i>Miniopterus pusillus</i> (Lesser bent-winged bat)    | Kidney                                     | MPK     | In-house development |               |
|                          | <i>Myotis ricketti</i> (Rickett's big-footed bat)       | Kidney                                     | MRK     | In-house development |               |
|                          | <i>Myotis ricketti</i> (Rickett's big-footed bat)       | Lung                                       | MRL     | In-house development |               |
|                          | <i>Pipistrellus abramus</i> (Japanese pipistrelle)      | Kidney                                     | PAK     | In-house development |               |
|                          | <i>Pipistrellus abramus</i> (Japanese pipistrelle)      | Lung                                       | PAL     | In-house development |               |
|                          | <i>Rhinolophus sinicus</i> (Chinese horseshoe bat)      | Kidney                                     | RSK     | In-house development |               |
|                          | <i>Rhinolophus sinicus</i> (Chinese horseshoe bat)      | Lung                                       | RSL     | In-house development |               |
|                          | <i>Tylonycteris pachypus</i> (Lesser bamboo bat)        | Kidney                                     | TPK     | In-house development |               |
|                          | <i>Tylonycteris pachypus</i> (Lesser bamboo bat)        | Lung                                       | TPL     | In-house development |               |
|                          | <i>Rousettus leschenaultii</i> (Leschenault's rousette) | Kidney                                     | RLK     | In-house development |               |
|                          | <i>Rousettus leschenaultii</i> (Leschenault's rousette) | Lung                                       | RLL     | In-house development |               |
|                          | Camel                                                   | <i>Camelus dromedarius</i> (Arabian camel) | Kidney  | Caki-3-R             | CCLV-RIE 1284 |
|                          |                                                         | <i>Camelus dromedarius</i>                 | Skin    | Dubca                | ATCC CRL-2276 |
|                          | Human                                                   | <i>Homo sapiens</i>                        | Lung    | Calu-3               | ATCC HTB-55   |
|                          |                                                         | <i>Homo sapiens</i>                        | Cervix  | HeLa                 | ATCC CCL-2    |
| <i>Homo sapiens</i>      |                                                         | Colon                                      | HRT-18G | ATCC CRL-11663       |               |
| <i>Homo sapiens</i>      |                                                         | Colon                                      | HT-29   | ATCC HTB-38          |               |
| <i>Homo sapiens</i>      |                                                         | Liver                                      | Huh-7   | JCRB0403             |               |
| <i>Homo sapiens</i>      |                                                         | Histiocytes                                | His-1   | In-house development |               |
| <i>Homo sapiens</i>      |                                                         | Bronchia/trachea                           | NHBE    | Lonza CC-2540        |               |
| <i>Homo sapiens</i>      |                                                         | Lung                                       | A549    | ATCC CCL-185         |               |
| <i>Homo sapiens</i>      |                                                         | Cervix                                     | Hep-2   | ATCC CCL-23          |               |
| <i>Homo sapiens</i>      |                                                         | Embryonic Lung                             | HFL     | In-house development |               |
| <i>Homo sapiens</i>      |                                                         | Neuromuscular                              | NT2/D1  | ATCC CRL-1973        |               |
| <i>Homo sapiens</i>      |                                                         | Muscle                                     | RD      | ATCC CCL-136         |               |
| <i>Homo sapiens</i>      |                                                         | Peripheral blood                           | THP-1   | ATCC TIB-202         |               |
| <i>Homo sapiens</i>      |                                                         | Lymphoblast                                | Raji    | ATCC CCL-86          |               |
| <i>Homo sapiens</i>      |                                                         | Embryonic Kidney                           | 293T    | ATCC CRL-3216        |               |
| <i>Homo sapiens</i>      |                                                         | Colon                                      | CaCO2   | ATCC HTB-37          |               |
| Cat                      |                                                         | <i>Felis catus</i>                         | Kidney  | CRFK                 | ATCC CCL-94   |
| Pig                      |                                                         | <i>Sus scrofa</i>                          | Kidney  | PK15                 | ATCC CCL-33   |
| Mouse                    | <i>Mus musculus</i>                                     | Embryonic kidney                           | 3T3     | ATCC CCL-92          |               |
| Rat                      | <i>Rattus norvegicus</i>                                | Kidney                                     | RK3E    | ATCC CRL-1895        |               |
| Monkey                   | <i>Macaca mulatta</i> (Rhesus monkey)                   | Kidney                                     | LLC-MK2 | ATCC CCL-7           |               |
|                          | <i>Cercopithecus aethiops</i> (African green monkey)    | Kidney                                     | Vero    | ATCC CCL-81          |               |
|                          | <i>Cercopithecus aethiops</i> (African green monkey)    | Kidney                                     | Vero E6 | ATCC CRL-1586        |               |
|                          | <i>Cercopithecus aethiops</i> (African green monkey)    | Kidney                                     | BS-C-1  | ATCC CCL-26          |               |

**Supplementary Table 3** Neutralization antibody titers of MERS-infected camel sera with MERS-CoV neutralizing antibodies against *Ty*-BatCoV HKU4

| Camel sera | Neutralization antibody titer<br>(MERS-CoV) | Neutralization antibody titer<br>( <i>Ty</i> -BatCoV HKU4) |
|------------|---------------------------------------------|------------------------------------------------------------|
| 1          | <10                                         | <10                                                        |
| 2          | 10                                          | <10                                                        |
| 3          | 10                                          | <10                                                        |
| 4          | 10                                          | <10                                                        |
| 5          | 10                                          | <10                                                        |
| 6          | 10                                          | <10                                                        |
| 7          | 10                                          | <10                                                        |
| 8          | 10                                          | <10                                                        |
| 9          | 80                                          | <10                                                        |
| 10         | 80                                          | <10                                                        |
| 11         | 80                                          | <10                                                        |
| 12         | 80                                          | <10                                                        |
| 13         | 80                                          | <10                                                        |
| 14         | 80                                          | <10                                                        |
| 15         | 80                                          | <10                                                        |
| 16         | 160                                         | <10                                                        |

**Supplementary Table 4** Number of mice positive for *Ty*-BatCoV HKU4 SM3A in different tissues

| Dpi | Tissues | Number of mice positive |
|-----|---------|-------------------------|
| 2   | lung    | 4/8                     |
|     | brain   | 0/8                     |
|     | spleen  | 0/8                     |
| 4   | lung    | 5/7                     |
|     | brain   | 0/7                     |
|     | spleen  | 0/7                     |
| 7   | lung    | 7/11                    |
|     | brain   | 5/11                    |
|     | spleen  | 1/11                    |
| 14  | lung    | 0/13                    |
|     | brain   | 8/13                    |
|     | spleen  | 0/13                    |
| 28  | lung    | 0/4                     |
|     | brain   | 0/4                     |
|     | spleen  | 0/4                     |

**Supplementary Table 5** List of primers used for complete *Ty*-BatCoV HKU4 S gene sequencing

| Primer    | Primer sequence (5'->3')  | Forward/Reverse (F/R) |
|-----------|---------------------------|-----------------------|
| LPW 3797  | AGATTTATATAAAAATTATGGGAA  | F                     |
| LPW 4102  | TACGTGGTTTTAATATGCAATAAAA | R                     |
| LPW 3899  | TCTCTTACTAATACATCGGCT     | F                     |
| LPW 3900  | AAGACCTGACCATCTTCAGAAA    | R                     |
| LPW 33089 | TTACATTTCTAAGTGTTCTCGC    | F                     |
| LPW 33090 | GTAACAACAATAGGAGAAGTA     | R                     |
| LPW 2821  | GTCATAAAGTGGTGGTAAAACCT   | R                     |
| LPW 3720  | CATTAGTAGTTAGTGATTGTAAA   | F                     |
| LPW 2320  | TTTGGGTAACCTCAATNCCRTT    | R                     |
| LPW 2319  | ATTAATGCTAGAGAYCTHMTTGT   | F                     |
| LPW 33092 | AGAGACCATAGGCTGCTGTAA     | R                     |
| LPW 33091 | CTGGTTTATCATCCTTTGCTG     | F                     |
| LPW 2824  | TTTGCCGCTATACCTTTTGCACAA  | F                     |
| LPW 2317  | GAGCCAAACATACCANGGCCAYTT  | R                     |
| LPW 33093 | TTTTCAAGAATGTTACCTCGC     | F                     |
| LPW 33094 | ATACGGAAAAACCAACATCA      | R                     |

**Supplementary Table 6** List of primers used for complete genome sequencing of *Ty-BatCoV HKU4*

SM3A

| Primer   | Primer sequence (5'→3')    | Forward/Reverse (F/R) |
|----------|----------------------------|-----------------------|
| LPW4830  | TCCAAACTTGAATCATATGGAAA    | F                     |
| LPW4519  | AACTTAAATAATAGCCTTGCTGTGT  | R                     |
| LPW35132 | TACTGGAGGTATGCTTTCAA       | F                     |
| LPW4632  | TATATGTGTGGCAAAAACGGTAAA   | F                     |
| LPW4729  | TGGGTTGTTGTGATGGTACTAT     | F                     |
| LPW4633  | ATGCTCATTAGTTGGTTCTAATTGA  | R                     |
| LPW4469  | AGTGCTAGGGGTAGAGTCTATTGA   | R                     |
| LPW4503  | AGTAATACGGAATCACCTACATGAA  | R                     |
| LPW4502  | TGGTGGTGATGTTTCAGGAAGAAT   | F                     |
| LPW4497  | TACAACAAATTTCCACTGCTGAA    | R                     |
| LPW4429  | AGGTGAATATTTAATGGTAGGTTTA  | R                     |
| LPW4930  | TATGTCCATATTCGAGTGAAGGAT   | F                     |
| LPW4931  | TAGCTTTCCAGTCTACACGCTTA    | R                     |
| LPW4498  | TTATGGCCTAAGAAACAACCAA     | F                     |
| LPW4737  | ACGTGTTGAAGCTTCCACCATT     | F                     |
| LPW4831  | TTCATATAATCACCCTATTCCAAA   | R                     |
| LPW4430  | TTTAGGTTGTTTGATTGACCTTA    | F                     |
| LPW4829  | TTCTCTGATAGTGGCTGTGTGCTTT  | F                     |
| LPW4500  | TGCGGCACAAGCCTCTCTATA      | R                     |
| LPW35133 | GCTTTCAGGATGCTGCTAG        | F                     |
| LPW3796  | TCTGGTGGGTTTTACAAACCACTT   | R                     |
| LPW3794  | ACTTACAACCATTTAGAACTG      | R                     |
| LPW3793  | TCTATATGCATCAGATGGAATTA    | F                     |
| LPW3795  | ATCAAATGGTACACATACTGGTA    | F                     |
| LPW35134 | CGCACTACACATTTGGACT        | F                     |
| LPW3790  | AACATCATTATCTAACTTCTTAA    | R                     |
| LPW4504  | AGCTATGACATCTATGTATAAGCAA  | F                     |
| LPW4072  | TTCTAGTCGGGCATTTACACTAGAA  | R                     |
| LPW3232  | AACTAATATGCTCTTTAACACTTCAC | R                     |
| LPW3283  | GTAATGTCTGTCAGTATTGGGTT    | F                     |
| LPW2773  | GTTGGGTAATAACAAAATCACCAA   | R                     |
| LPW2771  | TGYTAYGCTTTAMGNCAYYTYGA    | F                     |
| LPW2626  | GTTTTAACACTYGATAAYGARGA    | F                     |
| LPW2630  | AGTATATTGAARTTNGCACARTG    | R                     |
| LPW2738  | CCACCCTAATTGTGTTAATTGTA    | F                     |
| LPW2775  | TAAGTGAAGACCCTTCCTTGA      | R                     |
| LPW3234  | GCCAAAATCAATGACGCTAAAAT    | R                     |
| LPW3233  | GGCAATTTTAAATAAAGATTTTATGA | F                     |
| LPW1507  | GGTTGGGACTATCCTAAGTGTGA    | F                     |
| LPW8143  | ACCATCATCNGANARDATCATNA    | R                     |
| LPW1037  | WTATKTKAARCCWGGTGG         | F                     |

|          |                                         |   |
|----------|-----------------------------------------|---|
| LPW1040  | KYDBWRTRTARCAMACAAC                     | R |
| LPW3235  | CTTAATAAACACTTTTCTATGATGAT              | F |
| LPW2583  | AAGTGTTGTTATGATCAYGTNAT                 | F |
| LPW2587  | TTACCTCTACCAGGAGGNCCYTG                 | R |
| LPW2679  | CAGCACGCATTGTTTATACAGCAT                | F |
| LPW2774  | TTAGTCCTAACATGGATCTAGCT                 | R |
| LPW36404 | AAAGGCAGTGTGACGCA                       | F |
| LPW2739  | AGCTAGATCCATGTTAGGACTAA                 | F |
| LPW2595  | TGTATCCCCACTGYTGDATRTC                  | R |
| LPW2598  | CAATCCACATTRCARTTRCARAA                 | R |
| LPW2820  | CAACCACGACCGGTATTGTGGCAT                | F |
| LPW2940  | TTAAGAAATTGTTTTACACAGAT                 | F |
| LPW2934  | ATCTCCATAAACGATRTGYTCRAA                | R |
| LPW3710  | ACAACATCTATGGTACAACACTACAA              | F |
| LPW3798  | TCCAAAATATATAATTGGCA                    | R |
| LPW4102  | TACGTGGTTTTAATATGCAATAAAA               | R |
| LPW3797  | AGATTTATATAAAATTATGGGAA                 | F |
| LPW3899  | TCTCTTACTAATACATCGGCT                   | F |
| LPW3900  | AAGACCTGACCATCTTCAGAAA                  | R |
| LPW3712  | CTAGCGCTATAACTTCTAAAAGTA                | R |
| LPW4103  | TGGTGCAAACCAAGATGTTGAAA                 | F |
| LPW3720  | CATTAGTAGTTAGTGATTGTAAA                 | F |
| LPW2821  | GTCATAAAGTGGTGGTAAAACCTT                | R |
| LPW2319  | ATTAATGCTAGAGAYCHMTTTG                  | F |
| LPW2320  | TTTGGGTAACCTCAATNCCRTT                  | R |
| LPW2824  | TTTGCCGCTATACCTTTTGCACAA                | F |
| LPW2317  | GAGCCAAACATACCANGGCCAYTT                | R |
| LPW36405 | TTG ACC TTT CAG ATG AGA TG              | F |
| LPW36406 | TGG ATA CAG GTA ATG ATA CTG AC          | R |
| LPW4394  | GGGGAGCATACCAAGAAACATT                  | R |
| LPW36407 | TCAGCAAGAACCTACTCACT                    | F |
| LPW4486  | TTGGAGTTTAAAAAGCTCTGTGTT                | F |
| LPW4487  | AAGGGTACTGTTTTATCACTAGAA                | R |
| LPW4380  | GACCCTAAAGTGTCTTTTGAGTA                 | R |
| LPW2918  | TTGATGTGGCTTAGCTAYTTYGT                 | F |
| LPW2831  | TGGGCCAGTTCCTARRTARTARAA                | R |
| LPW3815  | GAAAATCAACACCGGTAATGGT                  | F |
| LPW418   | GACCACGCGTATCGATGTCGACTTTTTTTTTTTTTTTTV | R |

---



**Supplementary Table 7** List of primers used for cloning

| Gene            | Primer      | Sequence (5'-3')                                                                    |
|-----------------|-------------|-------------------------------------------------------------------------------------|
| dcDPP4          | F: LPW34010 | ATTC <b><u>CTCGAG</u></b> ATGAAGACACCGTGGAGGGTGCTCCTGGGA                            |
|                 | R: LPW34011 | ATT <b><u>GGTACC</u></b> CTAAGGTAAAGAGAAGCATTGCTTTAGGAAGTG                          |
| TpDPP4          | F: LPW33360 | ATTC <b><u>CTCGAG</u></b> AGTCGCAGGACCTATACCCTAACTGATTATTTAAAAAGT                   |
|                 | R: LPW33361 | ATT <b><u>GGTACC</u></b> TAAGGTAAAGAGAAGCATTGCTTTAGGAAGTGGGTCATG                    |
| hDPP4           | F: LPW34048 | ATTC <b><u>CTCGAG</u></b> ATGAAGACACCGTGGAAGGTTCTTCTGG                              |
|                 | R: LPW34039 | ATT <b><u>GGTACC</u></b> AGGTAAAGAGAAACATTGTTTTATGAAGTG                             |
| HA tag          | F: LPW34039 | ATT <b><u>GGTACC</u></b> TACCCATACGATGTTCCAGATTACGCTTAG <b><u>GCGGCCG</u></b> CACT  |
|                 | R: LPW34040 | AGT <b><u>GCGGCCG</u></b> CCTAAGCGTAATCTGGAACATCGTATGGGTAG <b><u>GGTACC</u></b> AAT |
| MERS-RBD-Fc-his | F: LPW36700 | ATCC <b><u>GCGGCCG</u></b> CGCCACCATGAAAATGATACTCAGTGTTTCTACTGATGTTT                |
|                 | R: LPW36701 | TGTC <b><u>ACTAGT</u></b> ATATTCCACGCAATTGCCTAATTGAGAGGCAATTTTTGTGTCAT              |
| HKU4-RBD-Fc-his | F: LPW36702 | ATCC <b><u>GCGGCCG</u></b> CGCCACCATGAAAATGATTCACTCAGTGTTCTTGCTGATGTTT              |
|                 | R: LPW36703 | TGTC <b><u>ACTAGT</u></b> GTAATCGACACATTTCCCCAGTCTGTTTGTGATGGTGAGAGAGTC             |

Notes: the restriction site was highlighted with bold and underlined.

**Supplementary Table 8** Gating strategy used for flow cytometry analysis

| HEK293T cell                     | Calibration for negative control                                                   |
|----------------------------------|------------------------------------------------------------------------------------|
| HEK293T-hDPP4                    | Alexa Fluor 647 conjugated anti-HA antibody<br>6x-His Tag Monoclonal Antibody FITC |
| HEK293T-hDPP4+MERS-RBD           | Alexa Fluor 647 conjugated anti-HA antibody<br>6x-His Tag Monoclonal Antibody FITC |
| HEK293T-hDPP4+HKU4-RBD           | Alexa Fluor 647 conjugated anti-HA antibody<br>6x-His Tag Monoclonal Antibody FITC |
| HEK293T- <i>Tp</i> DPP4          | Alexa Fluor 647 conjugated anti-HA antibody<br>6x-His Tag Monoclonal Antibody FITC |
| HEK293T- <i>Tp</i> DPP4+MERS-RBD | Alexa Fluor 647 conjugated anti-HA antibody<br>6x-His Tag Monoclonal Antibody FITC |
| HEK293T- <i>Tp</i> DPP4+HKU4-RBD | Alexa Fluor 647 conjugated anti-HA antibody<br>6x-His Tag Monoclonal Antibody FITC |
| HEK293T-dcDPP4                   | Alexa Fluor 647 conjugated anti-HA antibody<br>6x-His Tag Monoclonal Antibody FITC |
| HEK293T-dcDPP4+MERS-RBD          | Alexa Fluor 647 conjugated anti-HA antibody<br>6x-His Tag Monoclonal Antibody FITC |
| HEK293T-dcDPP4+HKU4-RBD          | Alexa Fluor 647 conjugated anti-HA antibody<br>6x-His Tag Monoclonal Antibody FITC |

**Supplementary Table 9** List of primers used for mouse cytokine profiling

| Gene                 | Primer      | Sequence (5'-3')        |
|----------------------|-------------|-------------------------|
| IL-1 $\beta$         | F: LPW34068 | TGGACCTTCCAGGATGAGGACA  |
|                      | R: LPW34069 | GTTTCATCTCGGAGCCTGTAGTG |
| IL-2                 | F: LPW34070 | GGACTTTCTGAGGAGATGGATAG |
|                      | R: LPW34071 | TGTTGTAAGCAGGAGGTACATAG |
| IL-6                 | F: LPW36745 | TAGTCCTTCCACCCCAATTTCC  |
|                      | R: LPW36746 | TTGGTCCTTAGCCACTCCTTC   |
| IL-12p40             | F: LPW34074 | TTGAACTGGCGTTGGAAGCACG  |
|                      | R: LPW34075 | CCACCTGTGAGTTCTTCAAAGGC |
| IFN- $\beta$         | F: LPW34090 | GCGGACTTCAAGATCCCTATG   |
|                      | R: LPW34091 | ACAATAGTCTCATTCCACCCAG  |
| IFN- $\gamma$        | F: LPW34092 | AAATCCTGCAGAGCCAGATTAT  |
|                      | R: LPW34093 | GCTGTTGCTGAAGAAGGTAGTA  |
| IP-10                | F: LPW34517 | ATCAGCACCATGAACCCAAG    |
|                      | R: LPW34518 | GTGGCAATGATCTCAACACG    |
| MCP-1                | F: LPW36689 | ACCACAGTCCATGCCATCAC    |
|                      | R: LPW36690 | TTGAGGTGGTTGTGGAAAAG    |
| MIP-1 $\alpha$       | F: LPW34086 | ACCATGACACTCTGCAACC     |
|                      | R: LPW34087 | CGATGAATTGGCGTGGAATC    |
| Mx1                  | F: LPW36687 | GGGGAGGAAATAGAGAAAATGAT |
|                      | R: LPW36688 | GTTTACAAAGGGCTTGCTTGCT  |
| RANTES               | F: LPW34088 | CCTGCTGCTTTGCCTACCTCTC  |
|                      | R: LPW34089 | ACACACTTGGCGGTTCCCTTCGA |
| TNF- $\alpha$        | F: LPW34076 | TTGTCTACTCCCAGGTTCTCT   |
|                      | R: LPW34077 | GAGGTTGACTTTCTCCTGGTATG |
| CXCL-1(KC)           | F: LPW34084 | TCCAGAGCTTGAAGGTGTTGCC  |
|                      | R: LPW34085 | AACCAAGGGAGCTTCAGGGTCA  |
| G-CSF                | F: LPW34078 | GCAGGCTCTATCGGGTATTTTC  |
|                      | R: LPW34079 | CACCCCTAGGTTTTCCATCTG   |
| Mouse $\beta$ -actin | F: LPW34519 | AGAGGGAAATCGTGCGTGAC    |
|                      | R: LPW34520 | CAATAGTGATGACCTGGCCGT   |

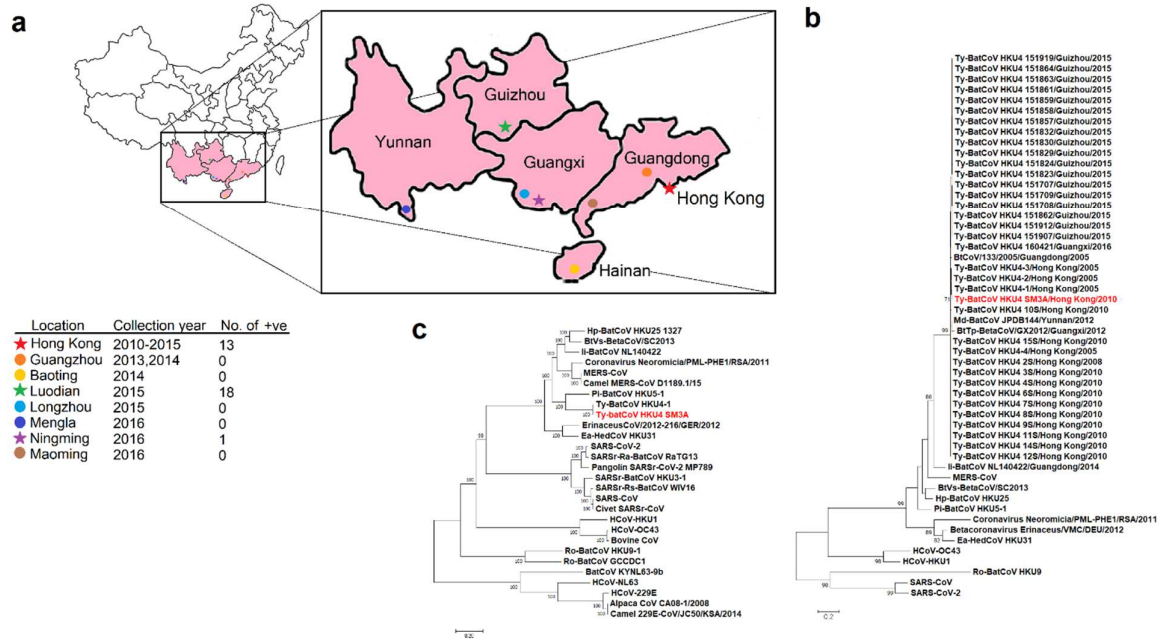

**Supplementary Figure 1** A 6-year surveillance study of merbecoviruses in bats from Hong Kong and mainland China. **(a)** Map showing various locations of bat sampling in five provinces of China (Guangxi, Guangdong, Guizhou, Hainan and Yunnan) and Hong Kong. Sampling locations with positive detection of *Ty*-batCoV HKU4 are indicated with stars. **(b)** Phylogenetic analysis of S1 aa sequences of *Ty*-BatCoV HKU4 strains and other betacoronaviruses. The trees were constructed by maximum likelihood method using WAG+G substitution models respectively and bootstrap values calculated from 1000 trees. Only bootstrap values >70% are shown. 175 aa positions were included in the analyses. The scale bars represent 5 substitutions per site respectively. The strain *Ty*-BatCoV HKU4 SM3A is red in color. **(c)** Phylogenetic analysis of the complete genomes of *Ty*-BatCoV HKU4 SM3A and other betacoronaviruses. The trees were constructed by maximum likelihood method using GTR+G+I substitution models respectively and bootstrap values calculated from 1000 trees. Only bootstrap values >70% are shown. The scale bars represent 5 substitutions per site respectively. The strain *Ty*-BatCoV HKU4 SM3A is red in color.

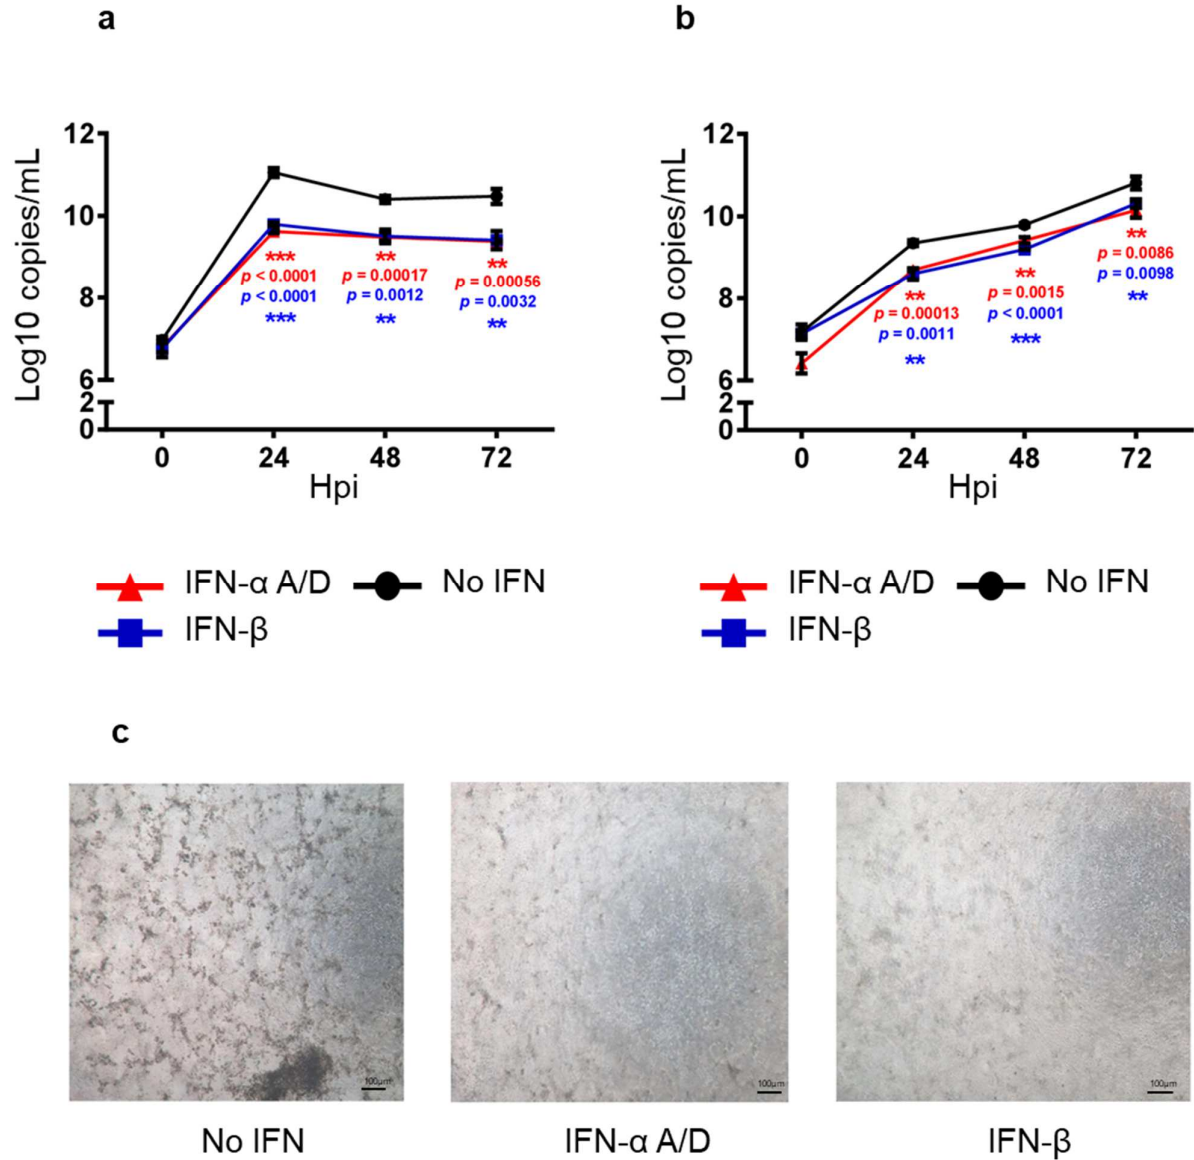

**Supplementary Figure 2** *Ty*-BatCoV HKU4 replication is inhibited by interferons- $\alpha/\beta$ . (a) MERS-CoV and (b) *Ty*-BatCoV HKU4 SM3A of MOI 1 were inoculated to IFNs pretreated Huh-7 cells. Culture supernatants were harvest at 0, 24, 48, 72 hpi. Viral loads were determined by RT-qPCR. Data are presented as mean values  $\pm$  SD,  $n = 3$  independent biological replicates at each time point. Dots in each graph represent individual samples. The p-values calculated by multiple two-tailed unpaired t test without correction for multiple comparisons between the control group and different IFN treatment groups at each time point are indicated (Red: IFN- $\alpha$  A/D; Blue: IFN- $\beta$ ). Statistical significances are indicated by the asterisks (\* $P < 0.05$ ; \*\* $P < 0.01$ ; \*\*\* $P < 0.0001$ ). (c) CPE of *Ty*-BatCoV HKU4

infections with different IFNs treatments were observed at 72 hpi. Scale bars, 100  $\mu\text{m}$ . Images are representative of three independent experiments.

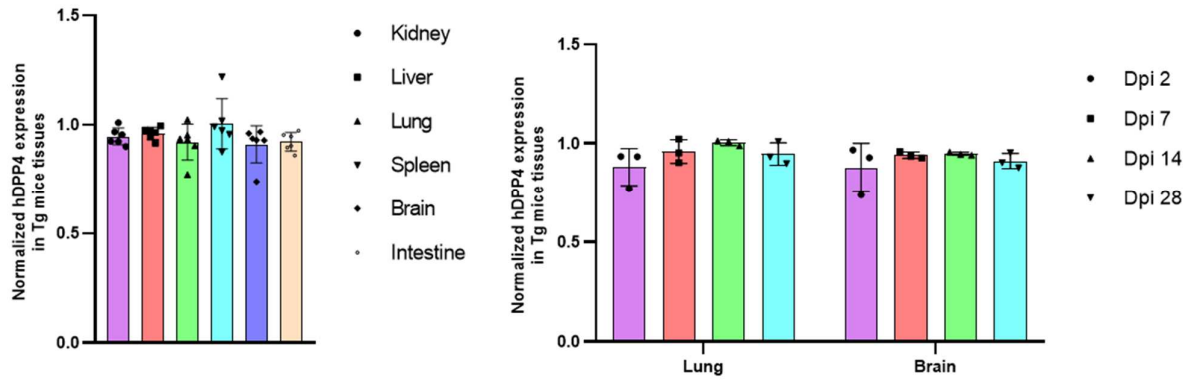

**Supplementary Figure 3** Expression of hDPP4 transgene in hDPP4 transgenic mice. **(a)** hDPP4 transgene expression in different tissues of hDPP4 transgenic mice was measured by qRT-PCR normalized to mouse GAPDH. **(b)** hDPP4 transgene expression in lung and brain tissues of hDPP4 transgenic mice from different indicated time points. Data are presented as mean values  $\pm$  SD,  $n = 6$  (a) or 3 (b) independent biological replicates. Dots in each graph represent individual samples.

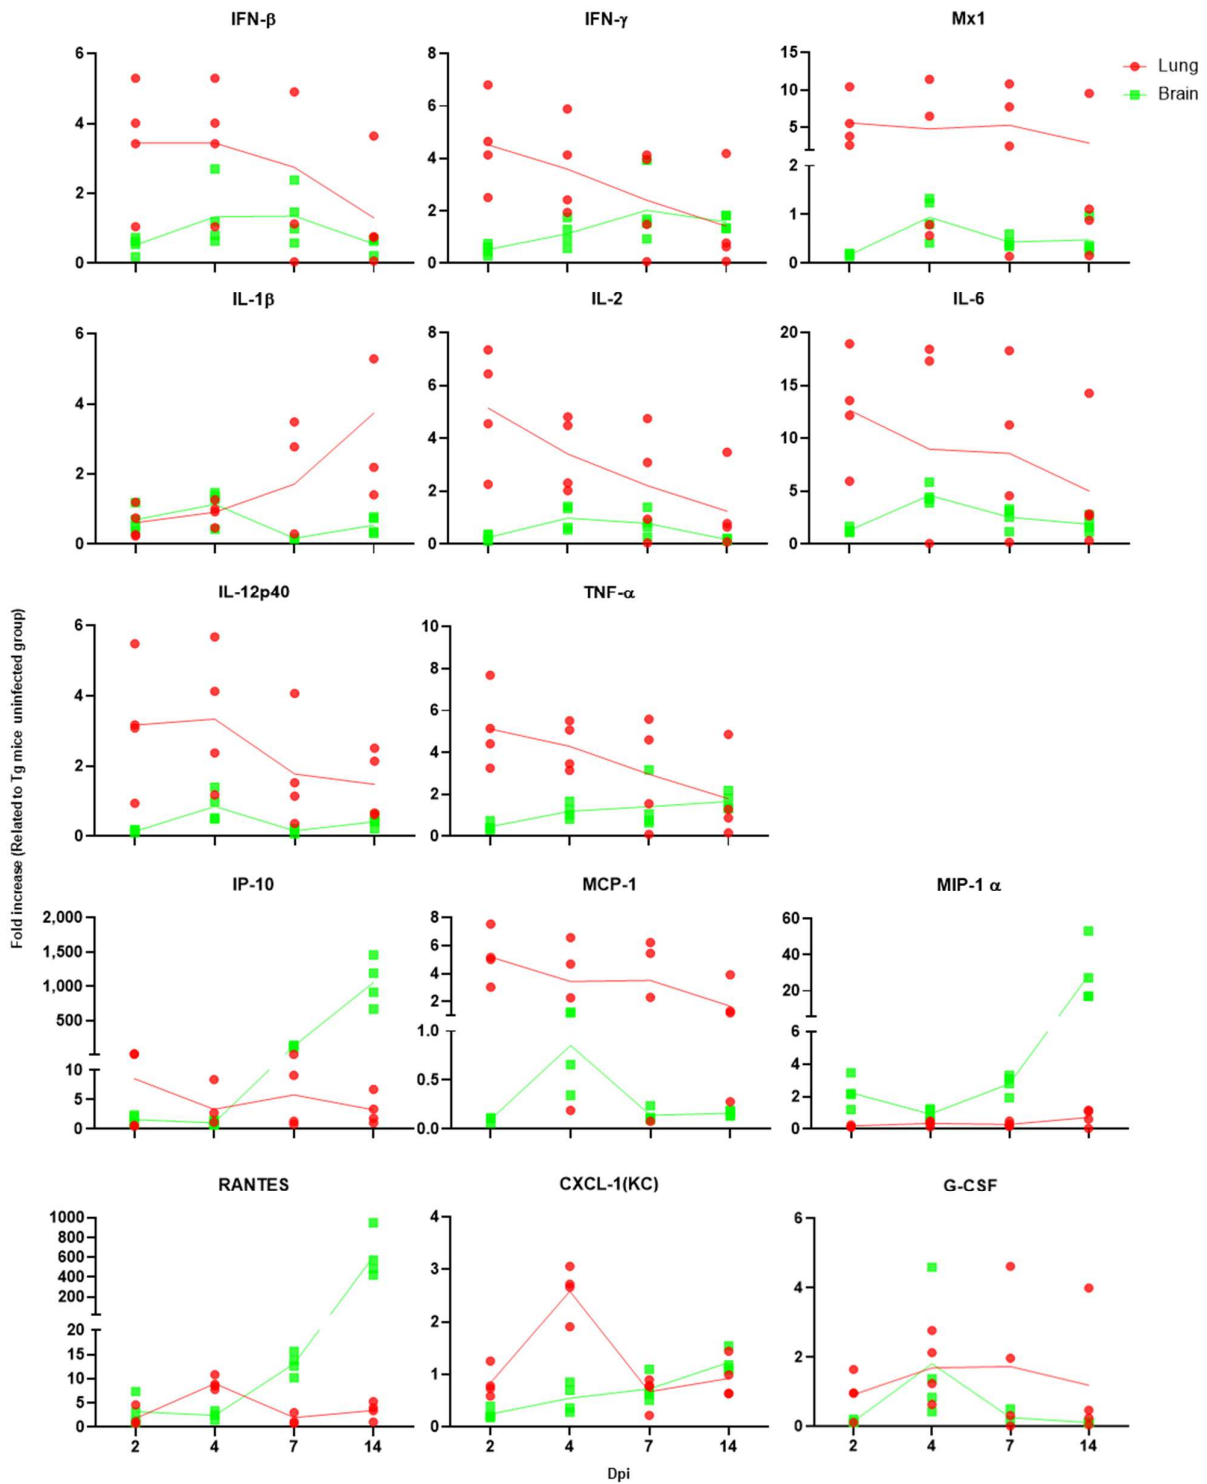

**Supplementary Figure 4** Cytokine response in the lung (red) and brain (green) tissues of *Ty*-BatCoV HKU4 SM3A-infected mice. The profiling of innate inflammatory response in the lung and brain tissues of *Ty*-BatCoV HKU4 SM3A-infected and uninfected transgenic mice at indicated time points



was determined by qPCR. The relative expression for each gene was calculated by the comparative  $\Delta\Delta\text{CT}$  method. Trend lines represent the changes in the relative cytokine level of *Ty-BatCoV HKU4* SM3A-infected mice in respective tissues (n=4 for each time point).

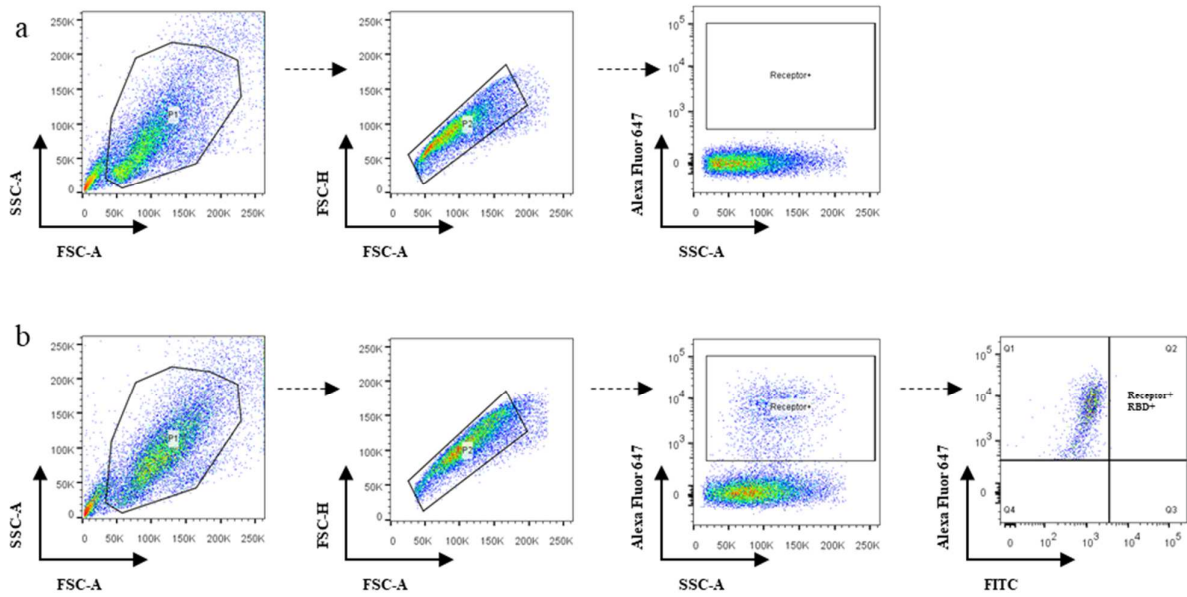

**Supplementary Figure 5** Gating strategy used in flow cytometry analysis in Fig. 3a. **(a)** Gating strategy to determine the boundary of different DPP4 receptor-positive (Receptor+) cells by using untransfected 293T cells. **(b)** Gating strategy to determine the boundary of RBD positive (RBD+) cells from Receptor+ cells.
